# Supplementary material for: Evaluating the safety and patient impacts of an artificial intelligence command centre in acute hospital care: a mixed-methods protocol
Source: PubMed Central journal article supplement (PMC8889317; doi:10.1136/bmjopen-2021-054090), 2022-03-01
Supplement: bmjopen-2021-054090supp001.pdf [file bmjopen-2021-054090supp001.pdf]

# Appendix 1-Research Aim-Activities Matrix

Below is a matrix that indicates which research activities address which research aims and objectives

|              |                                                                                                                                                                  | Patient-safety time-series analysis | Patient-flow process mining                                                                                                                                                                                                                                                                    | Data quality assessment | Unstructured observation | Structured observation | Stakeholder interview | Cross-industry consultation | CIO survey | Mixed-method synthesis | Dissemination |  |
|--------------|------------------------------------------------------------------------------------------------------------------------------------------------------------------|-------------------------------------|------------------------------------------------------------------------------------------------------------------------------------------------------------------------------------------------------------------------------------------------------------------------------------------------|-------------------------|--------------------------|------------------------|-----------------------|-----------------------------|------------|------------------------|---------------|--|
| <b>Aim 1</b> | Evaluate the impact of the CC on patient safety, hospital operational efficiency and related organisational processes.                                           | <b>a</b>                            | Describe (qualitatively) and evaluate (statistically) any effect on patient safety, including monitoring of deteriorating patients and sub-optimal care pathways, risk of harm due to cancellation/delays and situational awareness in safety-critical areas such as the emergency department. | X                       |                          |                        | X                     | X                           | X          |                        |               |  |
|              |                                                                                                                                                                  | <b>b</b>                            | Describe (qualitatively) and evaluate (statistically) any effect on patient flow, including capacity-demand ratio, transfer delays, bed utilisation, timely discharge and cancellations of scheduled care.                                                                                     |                         | X                        |                        | X                     | X                           |            |                        |               |  |
|              |                                                                                                                                                                  | <b>c</b>                            | Qualitatively investigate any effect on organisational processes, such as situational awareness, operational decision-making, risk and coordination/communication across organisational units, from multiple stakeholder perspectives.                                                         |                         |                          | X                      | X                     | X                           |            |                        |               |  |
| <b>Aim 2</b> | Understand the process of implementation and integration of the CC and associated data infrastructure and organisational processes within the primary study site | <b>a</b>                            | Using qualitative methods, describe the process of development and implementation of the CC, including critical implementation factors and any unintended consequences.                                                                                                                        |                         |                          |                        | X                     | X                           | X          |                        |               |  |
|              |                                                                                                                                                                  | <b>b</b>                            | Through ethnographic methods, investigate the process by which the CC system and outputs are embedded at all levels of the organisation, from frontline operations to strategic quality and safety governance.                                                                                 |                         |                          |                        |                       |                             | X          |                        |               |  |
|              |                                                                                                                                                                  | <b>c</b>                            | Develop and validate a logic model for this health informatics intervention that maps system preconditions, processes, technology and outcomes, at the primary study site.                                                                                                                     |                         |                          |                        |                       |                             |            |                        | X             |  |
|              |                                                                                                                                                                  | <b>d</b>                            | Describe (statistically and qualitatively) the effect of the CC implementation on the local data environment, including data infrastructure, quality and integration (i.e. system interoperability).                                                                                           |                         |                          | X                      | X                     | X                           | X          |                        |               |  |
| <b>Aim 3</b> | Elicit cross-sector and cross-industry perspectives on hospital command and control technologies to contextualise the findings from the                          | <b>a</b>                            | Review and understand command and control processes in non-healthcare safety-critical operations and the key principles and contextual factors that may influence transferability of these models into a hospital setting.                                                                     |                         |                          |                        |                       |                             | X          |                        |               |  |

|              |                                                                                                                                         |          |                                                                                                                                                                                                                                                    |  |  |  |  |  |  |  |   |  |   |
|--------------|-----------------------------------------------------------------------------------------------------------------------------------------|----------|----------------------------------------------------------------------------------------------------------------------------------------------------------------------------------------------------------------------------------------------------|--|--|--|--|--|--|--|---|--|---|
|              | primary study site for broader application.                                                                                             | <b>b</b> | Survey the perceptions of senior health informatics professionals on current command and control processes, viability of novel "mission-control" systems, data readiness and potential implementation barriers.                                    |  |  |  |  |  |  |  | X |  |   |
| <b>Aim 4</b> | Synthesise the research findings into practical outputs that will engage service stakeholders and inform future investment and practice | <b>a</b> | Share learning concerning cross-industry and empirical findings on the costs-benefit of investment within NHS management and Chief Information Officer networks.                                                                                   |  |  |  |  |  |  |  |   |  | X |
|              |                                                                                                                                         | <b>b</b> | Construct an empirically-informed implementation framework that describes contextual factors and implementation pathway for development of centralised, data-driven mission-control systems in acute care, including data infrastructure maturity. |  |  |  |  |  |  |  | X |  |   |
