# Supplementary material for: Evaluating the safety and patient impacts of an artificial intelligence command centre in acute hospital care: a mixed-methods protocol
Source: PubMed Central journal article supplement (PMC8889317; doi:10.1136/bmjopen-2021-054090), 2022-03-01
Supplement: bmjopen-2021-054090supp002.pdf [file bmjopen-2021-054090supp002.pdf]

## Appendix 2- Study Steering Group membership

Below are the details of the members of the Study Steering Committee for the NIHR HS&DR project entitled “Evaluating the safety and patient impacts of an AI Command Centre in the NHS” ([NIHR129483](#)).

| Name                | Affiliation                                                                                                   | Reason for nomination                                                                                                                                                              |
|---------------------|---------------------------------------------------------------------------------------------------------------|------------------------------------------------------------------------------------------------------------------------------------------------------------------------------------|
| Iain Buchan (Chair) | University of Liverpool; University of Manchester (Honorary)                                                  | Executive Dean, Institute of Population Health Sciences; Director of Digital Strategy and Partnerships, Liverpool Health Partners; Chair of Public Health and Clinical Informatics |
| Paul Charnley       | Wirral NHS Teaching Hospitals Trust                                                                           | Director of IT and Information at Wirral NHS Teaching Hospitals Trust                                                                                                              |
| Sarah Culkin        | NHS England; NHSX                                                                                             | Artificial Intelligence lead for NHS England                                                                                                                                       |
| Cindy Fedell        | Regional Chief Information Officer at Northwestern Ontario Hospitals                                          | Former Chief Information Officer at Bradford Teaching Hospitals NHS Foundation Trust                                                                                               |
| Hamish Fraser       | Brown University, USA                                                                                         | A health informatics academic and clinical lead for OpenMRS, the most-widely used open-source medical record system                                                                |
| Charles Koo         | Envive Technology, Ltd.; Visiting Scholar (Stanford University); Visiting Expert (National Taiwan University) | Implemented large scale Artificial-Intelligence, hospital systems at six hospitals in Shanghai, China.                                                                             |
| Farah Magrabi       | Macquarie University                                                                                          | Associate Professor Australian Institute of Health Innovation                                                                                                                      |
| Sue Mason           | Sheffield University; Sheffield NHS Teaching Hospitals Trust                                                  | Professor of Emergency Medicine at Sheffield University and clinician at Sheffield NHS Teaching Hospitals Trust                                                                    |
| Mark Sujan          | University of Warwick; Human Factors Everywhere                                                               | Human Factors expert                                                                                                                                                               |
| Hilary Thompson     | NIHR Yorkshire and Humber Patient Safety Translational Research Centre                                        | Patient representative and NIHR YH PSTRC Lay Leader                                                                                                                                |
| Sean White          | NHS Digital                                                                                                   | Senior Safety Engineer                                                                                                                                                             |
| Patrick Waterson    | Loughborough University                                                                                       | Reader in Human Factors and Complex Systems                                                                                                                                        |
